# Supplementary material
Source: Research Square preprint supplement (doi:10.21203/rs.3.rs-8626202/v1)
Supplement: Supplementary file 1 [file 36fe74466d78ca8b86af398d.xlsx]

## Sheet: Sheet1
Detailed List of GNG12 Mutations Across Various Cancer
Cancer Type	Cancer Type Detailed	Protein Change	Mutation Type	Ref	Var
Pancreatic Cancer	Pancreatic Adenocarcinoma	GNG12-SPATA6 Fusion	fusion
Sarcoma	Undifferentiated Pleomorphic Sarcoma/Malignant Fibrous Histiocytoma/High-Grade Spindle Cell Sarcoma	GNG12-PLXNA2 Fusion	fusion
Ovarian Epithelial Tumor	Serous Ovarian Cancer	GNG12-CYP4X1 Fusion	fusion
Glioma	Oligoastrocytoma	T68Nfs*9	Frame_Shift_Ins	-	T
Non-Small Cell Lung Cancer	Lung Squamous Cell Carcinoma	E44*	Nonsense_Mutation	C	A
Bladder Cancer	Bladder Urothelial Carcinoma	S7I	Missense_Mutation	C	A
Hepatobiliary Cancer	Hepatocellular Carcinoma	X32_splice	Splice_Site	C	G
Endometrial Cancer	Uterine Endometrioid Carcinoma	T68Lfs*22	Frame_Shift_Del	T	-
Endometrial Cancer	Uterine Mixed Endometrial Carcinoma	T68Lfs*22	Frame_Shift_Del	T	-
Endometrial Cancer	Uterine Endometrioid Carcinoma	T68Lfs*22	Frame_Shift_Del	T	-
Endometrial Cancer	Uterine Endometrioid Carcinoma	T68Nfs*9	Frame_Shift_Ins	-	T
Endometrial Cancer	Uterine Endometrioid Carcinoma	S33L	Missense_Mutation	G	A
Endometrial Cancer	Uterine Endometrioid Carcinoma	S33L	Missense_Mutation	G	A
Endometrial Cancer	Uterine Endometrioid Carcinoma	A14T	Missense_Mutation	C	T
Non-Small Cell Lung Cancer	Lung Adenocarcinoma	S2F	Missense_Mutation	G	A
Non-Small Cell Lung Cancer	Lung Adenocarcinoma	M1?	Translation_Start_Site	C	G
Esophagogastric Cancer	Stomach Adenocarcinoma	T68Lfs*22	Frame_Shift_Del	T	-
Esophagogastric Cancer	Stomach Adenocarcinoma	T68Lfs*22	Frame_Shift_Del	T	-
Esophagogastric Cancer	Stomach Adenocarcinoma	T68Lfs*22	Frame_Shift_Del	T	-
Esophagogastric Cancer	Stomach Adenocarcinoma	T68Lfs*22	Frame_Shift_Del	T	-
Esophagogastric Cancer	Stomach Adenocarcinoma	T68Lfs*22	Frame_Shift_Del	T	-
Esophagogastric Cancer	Stomach Adenocarcinoma	T68Lfs*22	Frame_Shift_Del	T	-
Esophagogastric Cancer	Diffuse Type Stomach Adenocarcinoma	T68Lfs*22	Frame_Shift_Del	T	-
Esophagogastric Cancer	Tubular Stomach Adenocarcinoma	T68Lfs*22	Frame_Shift_Del	T	-
Esophagogastric Cancer	Diffuse Type Stomach Adenocarcinoma	T68Lfs*22	Frame_Shift_Del	T	-
Esophagogastric Cancer	Stomach Adenocarcinoma	T68Nfs*9	Frame_Shift_Ins	-	T
Esophagogastric Cancer	Intestinal Type Stomach Adenocarcinoma	H46R	Missense_Mutation	T	C
Esophagogastric Cancer	Diffuse Type Stomach Adenocarcinoma	A12V	Missense_Mutation	G	A
Breast Cancer	Breast Invasive Lobular Carcinoma	T68Lfs*22	Frame_Shift_Del	T	-
Colorectal Cancer	Colon Adenocarcinoma	T68Lfs*22	Frame_Shift_Del	T	-
Colorectal Cancer	Mucinous Adenocarcinoma of the Colon and Rectum	T68Lfs*22	Frame_Shift_Del	T	-
Colorectal Cancer	Colon Adenocarcinoma	T68Lfs*22	Frame_Shift_Del	T	-
Colorectal Cancer	Colon Adenocarcinoma	T68Lfs*22	Frame_Shift_Del	T	-
Colorectal Cancer	Colon Adenocarcinoma	T68Lfs*22	Frame_Shift_Del	T	-
Colorectal Cancer	Colon Adenocarcinoma	T68Lfs*22	Frame_Shift_Del	T	-
Colorectal Cancer	Mucinous Adenocarcinoma of the Colon and Rectum	T68Lfs*22	Frame_Shift_Del	T	-
Colorectal Cancer	Colon Adenocarcinoma	H46R	Missense_Mutation	T	C
Renal Non-Clear Cell Carcinoma	Papillary Renal Cell Carcinoma	T68S	Missense_Mutation	G	C
Head and Neck Cancer	Head and Neck Squamous Cell Carcinoma	T68Lfs*22	Frame_Shift_Del	T	-
Cervical Cancer	Cervical Squamous Cell Carcinoma	T68Lfs*22	Frame_Shift_Del	T	-
Cervical Cancer	Cervical Squamous Cell Carcinoma	I71V	Missense_Mutation	T	C
